# Supplementary material for: PARP1 Trapping by PARP Inhibitors Drives Cytotoxicity in Both Cancer Cells and Healthy Bone Marrow
Source: Oxford University Press journal article supplement (doi:10.1158/1541-7786.mcr-18-0138), 2018-11-14
Supplement: 15417786mcr180138-sup-196855_2_supp_5083105_pgyg02.pdf [file 15417786mcr180138-sup-196855_2_supp_5083105_pgyg02.pdf]

## Supplemental Figure 1

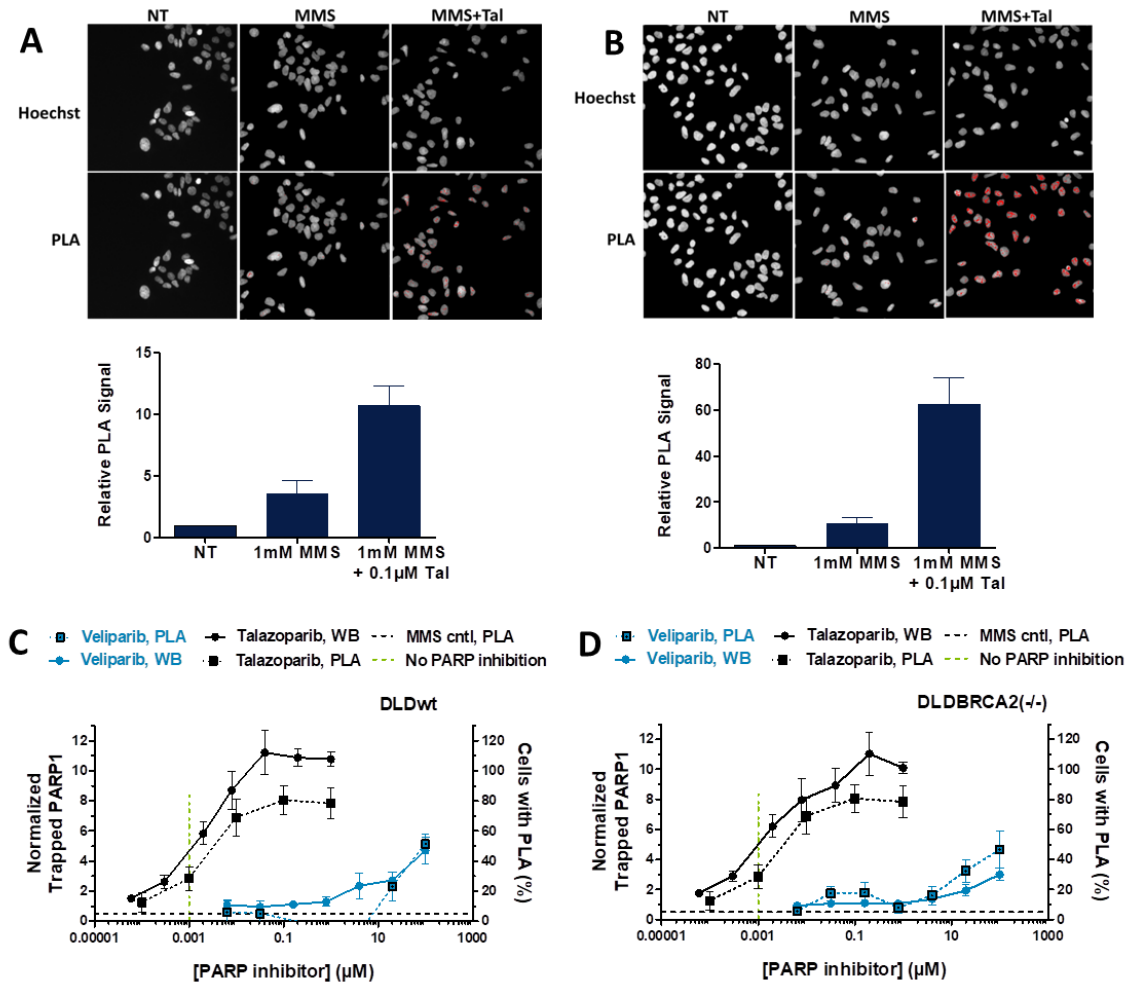

**Supplemental Figure 1. Association of PARP1 and H2A.X detected by Proximity Ligation Assay (PLA).** (A) PARP1 and total H2A.X antibody pair PLA detection of PARP-1 trapping. Top panels are representative pictures and data in graphs are presented as means  $\pm$  SEM from 3 independent experiments. (B) PARP-1 and  $\gamma$ H2A.X antibody pair PLA detection of PARP-1 trapping. (C), (D) DLD wt and DLD BRCA2 (-/-) isogenic cell lines treated for 4 hours with 1mM MMS and PARP inhibitor dose response to induce PARP1 trapping. Comparison of PLA trapping signal to Western blot PARP-1 trapping on chromatin shows strong correlation. Data are presented as means  $\pm$  SEM from 3 independent experiments.
