# Supplementary material for: PARP1 Trapping by PARP Inhibitors Drives Cytotoxicity in Both Cancer Cells and Healthy Bone Marrow
Source: Oxford University Press journal article supplement (doi:10.1158/1541-7786.mcr-18-0138), 2018-11-14
Supplement: 15417786mcr180138-sup-196855_2_supp_5083106_pgrg02.pdf [file 15417786mcr180138-sup-196855_2_supp_5083106_pgrg02.pdf]

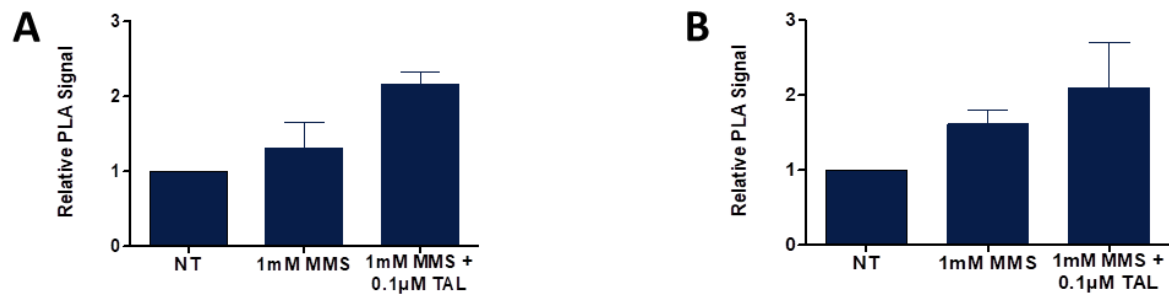

**Supplemental Figure 2. Association of PARP1 and other histone proteins detected by Proximity Ligation Assay (PLA).** (A) PARP1 and total Histone H3 antibody pair PLA detection of PARP-1 trapping. (B) PARP-1 and Histone H2B antibody pair PLA detection of PARP-1 trapping. Data are presented as means  $\pm$  SEM from 3 independent experiments.
